# Supplementary material
Source: publisher figshare collection journal article supplement (https://acs.figshare.com/ndownloader/files/3759382)
Supplement: Supplementary file 1 [file 3759382]

## Supporting Information

# Structural Flexibilities and Gas Adsorption Properties of One-Dimensional Copper(II) Polymers with Paddle-Wheel Units by Modification of Benzoate Ligands

*Kiyonori Takahashi,<sup>†</sup> Norihisa Hoshino,<sup>†,‡</sup> Takashi Takeda,<sup>†,‡</sup> Shin-ichiro Noro,<sup>¶</sup> Takayoshi Nakamura,<sup>¶</sup> Sadamu Takeda,<sup>±</sup> Tomoyuki Akutagawa<sup>\*†,‡</sup>*

<sup>†</sup> Graduate School of Engineering, Tohoku University, Sendai 980-8579, Japan.

<sup>‡</sup> Institute of Multidisciplinary Research for Advanced Materials (IMRAM), Tohoku University, 2-1-1 Katahira, Aoba-ku, Sendai 980-8577, Japan.

<sup>±</sup> Graduate School of Science, Hokkaido University, Sapporo 060-0810, Japan.

<sup>¶</sup> Research Institute for Electronic Science, Hokkaido University, Sapporo 001-0020, Japan.

## Infrared spectroscopy

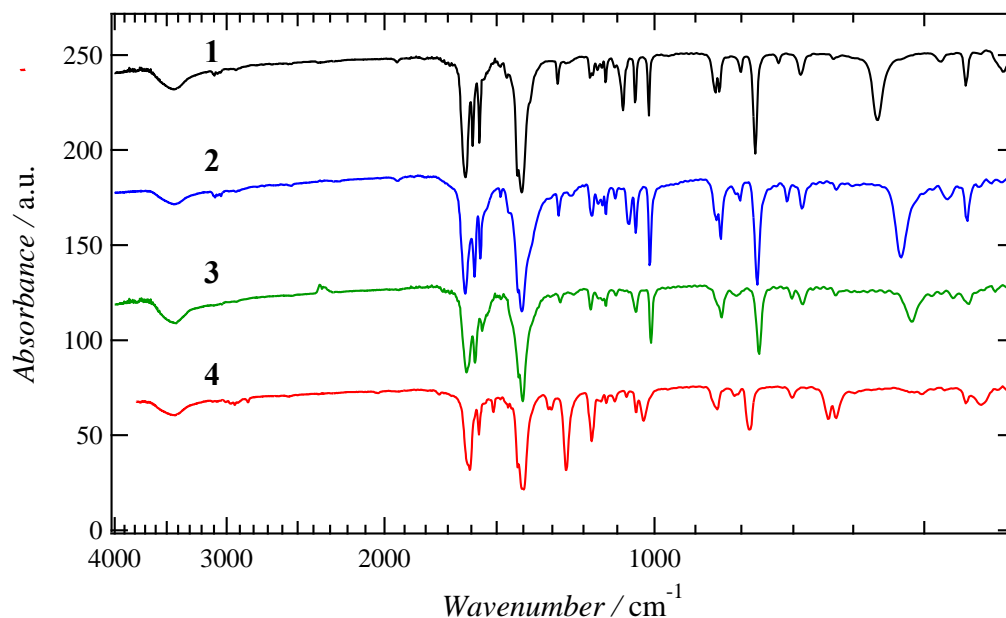

**Figure S1.** Infrared Spectra of **1** ~ **4**, ranged from 700 to 4000 cm<sup>-1</sup>. Black, blue, green and red colored lines correspond with **1**, **2**, **3** and **4**, respectively.

## Powder X-ray Diffraction Patterns

To determine structures of the single crystal and powder samples were same, Powder X-ray radiation diffraction spectra of powder samples were measured and compared with patterns simulated from single crystal X-ray structural analyses.

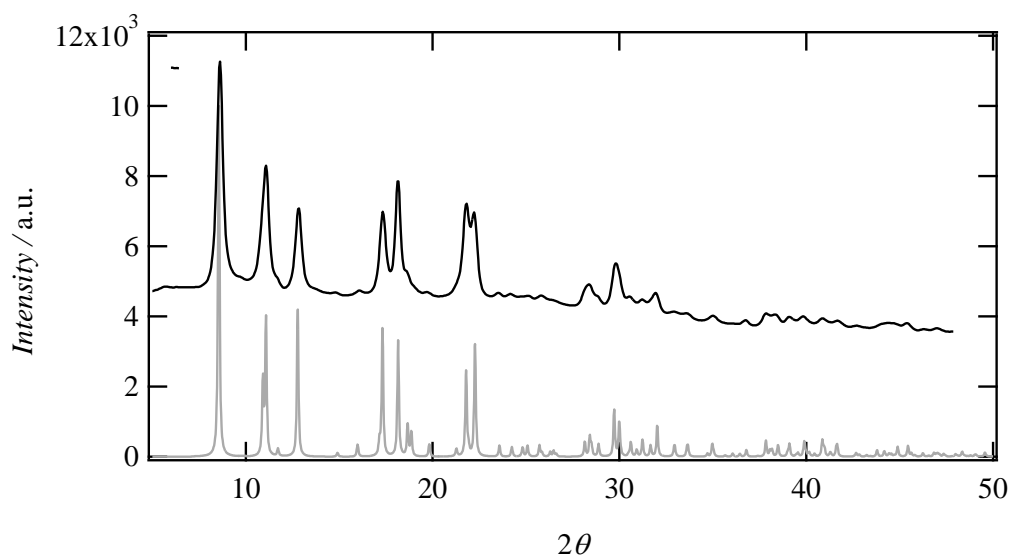

**Figure S2.** The powder X-ray diffraction patterns for **1**. The black-colored pattern was measured at 100 K. The gray-colored pattern was simulated from the single crystal structure of **1**.

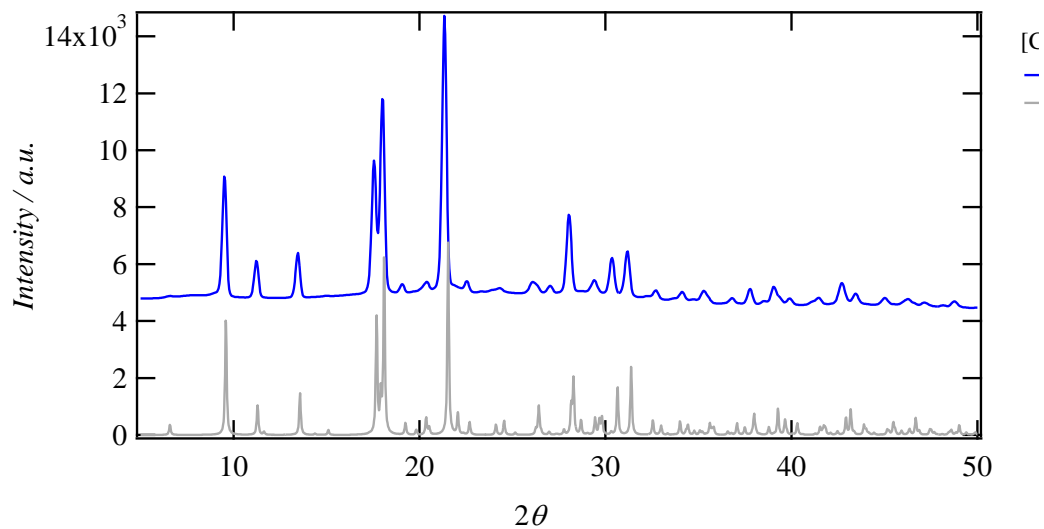

**Figure S3.** The powder X-ray diffraction patterns for **2**. The blue-colored pattern was measured at 100 K. The gray-colored pattern was simulated from the single crystal structure of **2**.

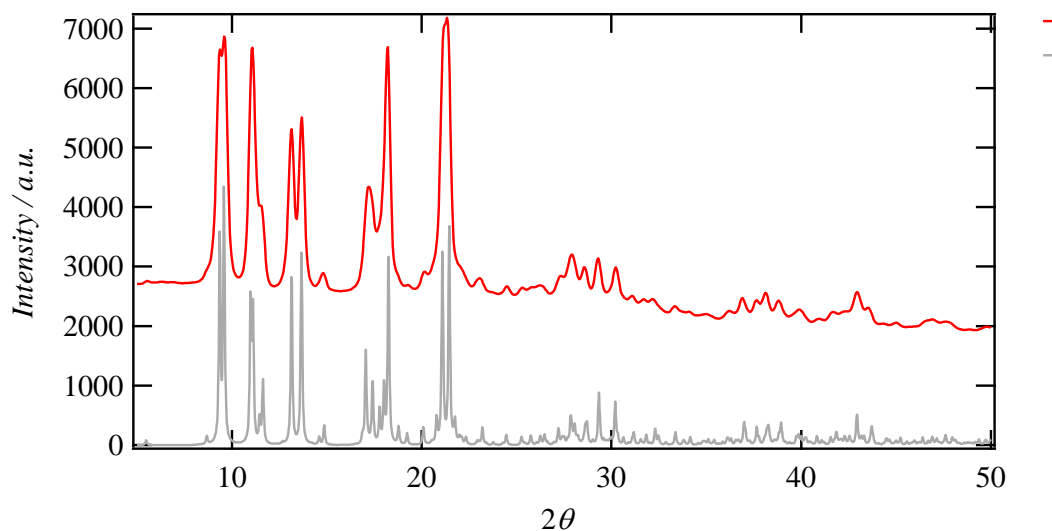

**Figure S4.** The powder X-ray diffraction patterns for **4**. The black-colored pattern was measured at 100 K. The gray-colored pattern was simulated from the single crystal structure of **4**.

Figures S2 ~ S4 summarized the powder patterns of crystal **1**, **2** and **4**. To determine the structures of crystalline powder samples and single crystal structures obtained from another synthesized methods were the same, the powder X-ray diffraction patterns were measured. The figures showed good agreement with each patterns. Therefore the crystalline powder samples had the same structures mentioned in this paper.

### Thermogravimetry analysis (TG).

TG analyses were carried out using a Rigaku Thermo plus TG8120 thermal analysis station using an  $\text{Al}_2\text{O}_3$  reference in the temperature range from 300 to 600 K with a heating rate of 5 K min<sup>-1</sup> under Ar.

Although over 20% weight-losses were observed over 500 K (1), 520 K(2), 450 K (3), 400 K(4) in TG diagrams, these were not corresponded to weight-loss of crystallization solvents because of the absence of crystallization solvents in the crystal structures.

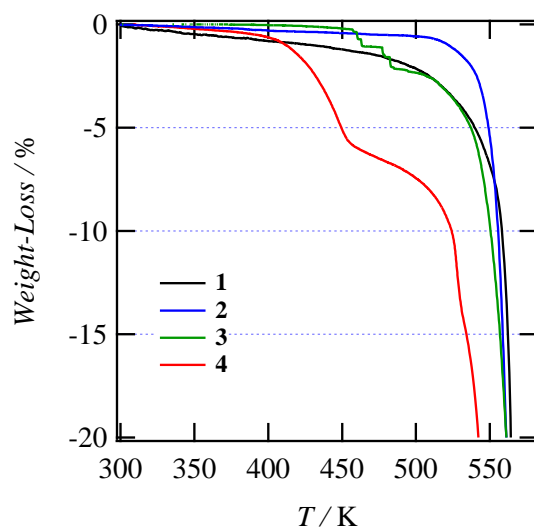

**Figure S5.** TG diagram of crystals **1**, **2**, **3**, and **4** under argon flow.

**Thermogravimetry- differential scanning calorimetry (DSC) measurements.**

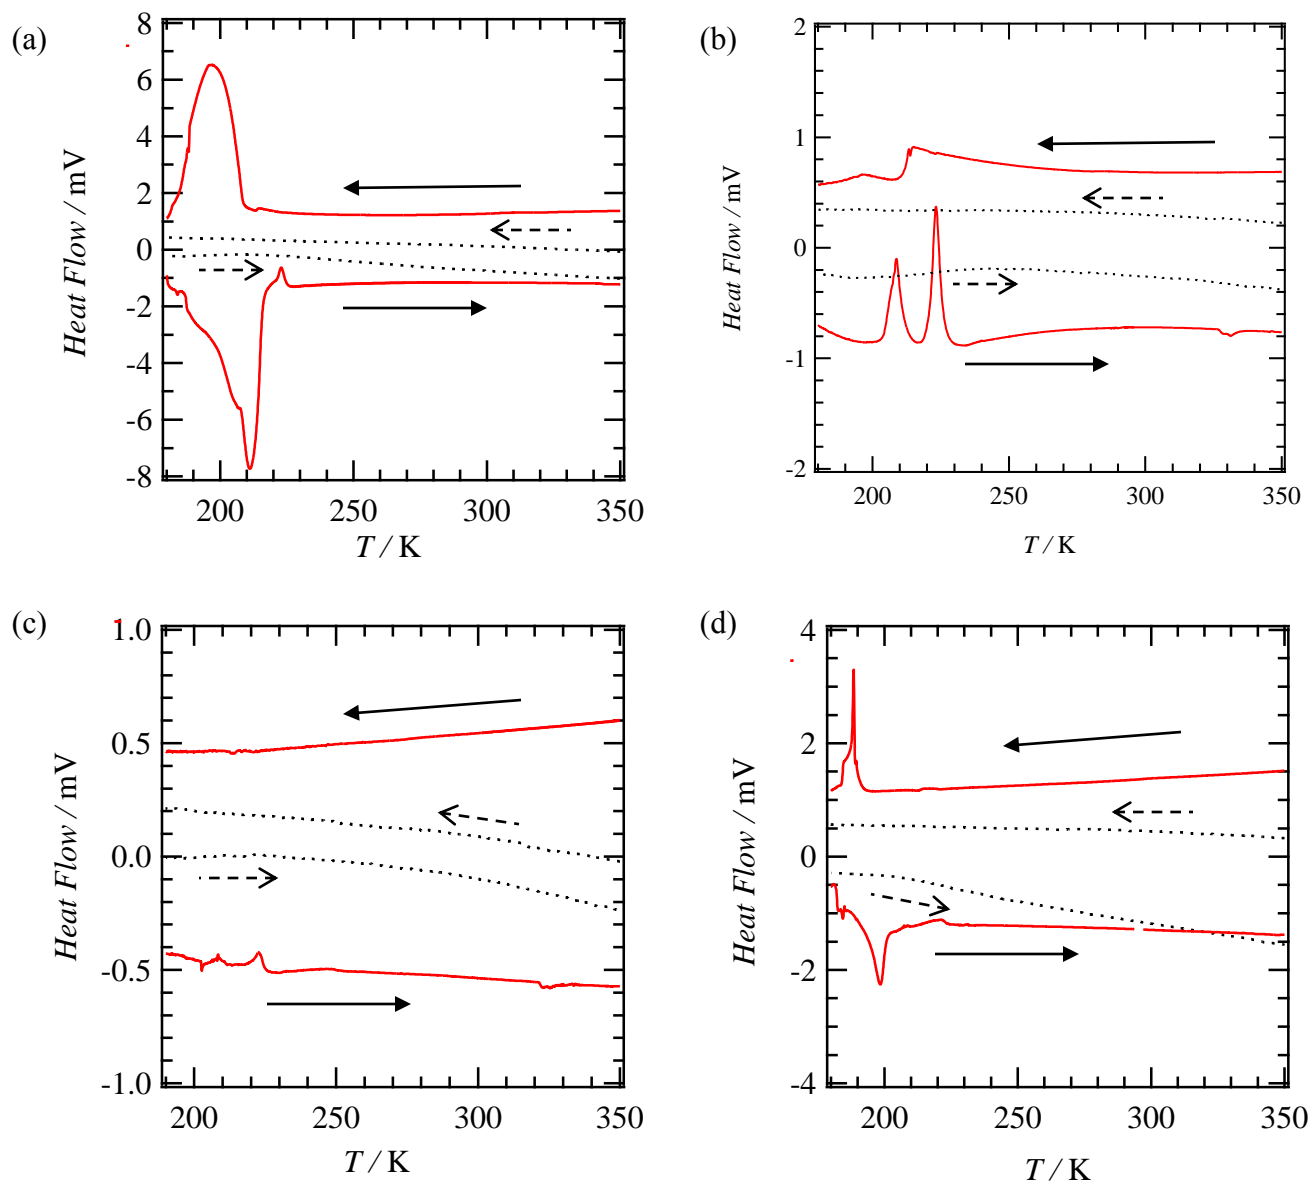

**Figure S6.** DSC traces for (a) crystals **1**, (b) **2**, (c) **3** and (d) **4** under Air (dotted line) and CO<sub>2</sub> gas flow (red line) with a scan rate of 5 K min<sup>-1</sup>. Right- and left-pointing arrows mean heating and cooling processes near the measured values and solid and dotted lines mean the scan under the CO<sub>2</sub> condition and Air.

The DSC analyses under the CO<sub>2</sub> condition were carried out using Mettler Toledo DSC 1 STARe System using an Al<sub>2</sub>O<sub>3</sub> reference in the temperature range from 170 to 350 K. The scan rate and CO<sub>2</sub> flow rate were 5 K min<sup>-1</sup> and 60 mL min<sup>-1</sup>, respectively. DSC analyses under Air were conducted using a Rigaku Thermo plus DSC 8230 with Al<sub>2</sub>O<sub>3</sub> as a reference in the temperature range from 170 to 350 K. The scan rate was 5 K min<sup>-1</sup>.

### Crystal shapes

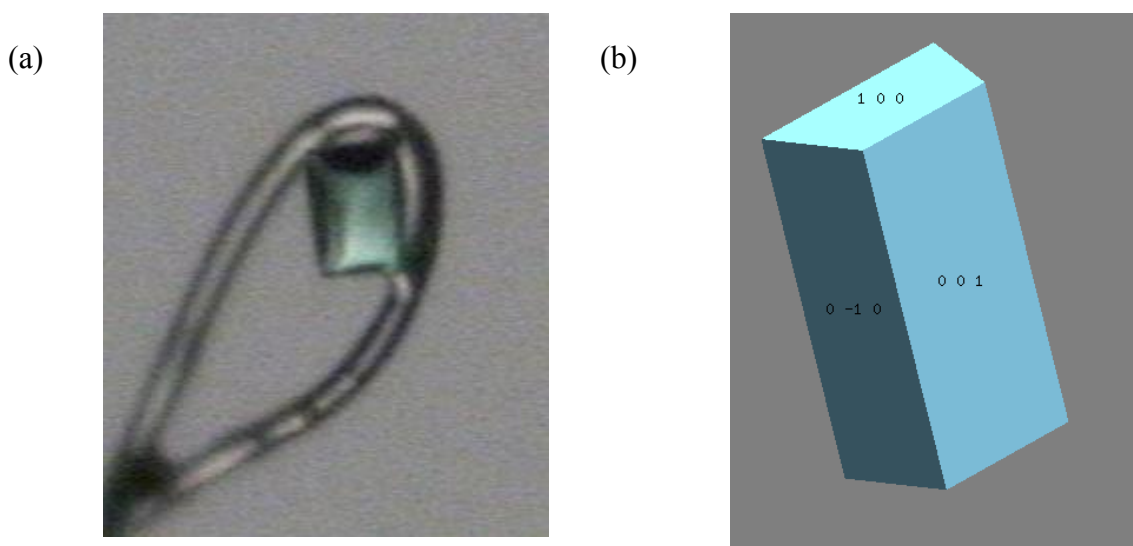

**Figure S7.** (a) Crystal shape of **2** mounted on thin polyimide films (MiTeGen MicroMounts). (b) Crystal shape calculated by Rigaku RAPID-II.

The pictures of crystal shape of **2** and **3** were taken and crystal shapes of them were calculated for Numerical Absorption Correction method. The shapes of these crystals were like block. The shapes of crystal **1** and **4** were similar to them.

(a)

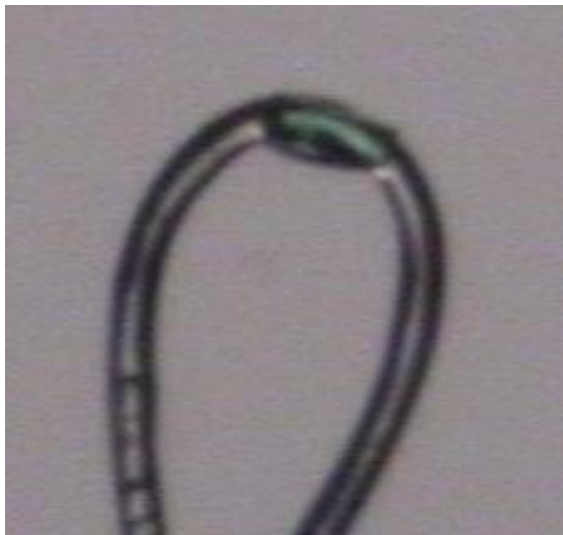

(b)

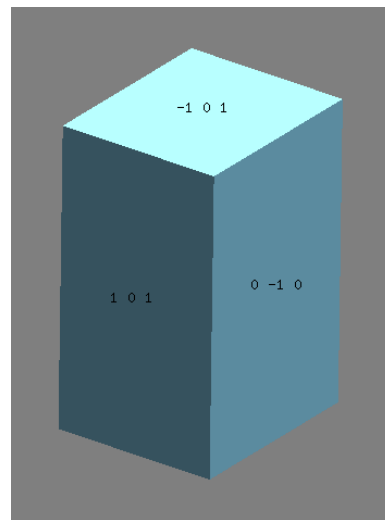

**Figure S8.** (a) Crystal shape of **3** mounted on thin polyimide films (MiTeGen MicroMounts).  
(b) Crystal shape calculated by Rigaku RAPID-II.



## Crystal Structures

Independent structures and coordination geometries.

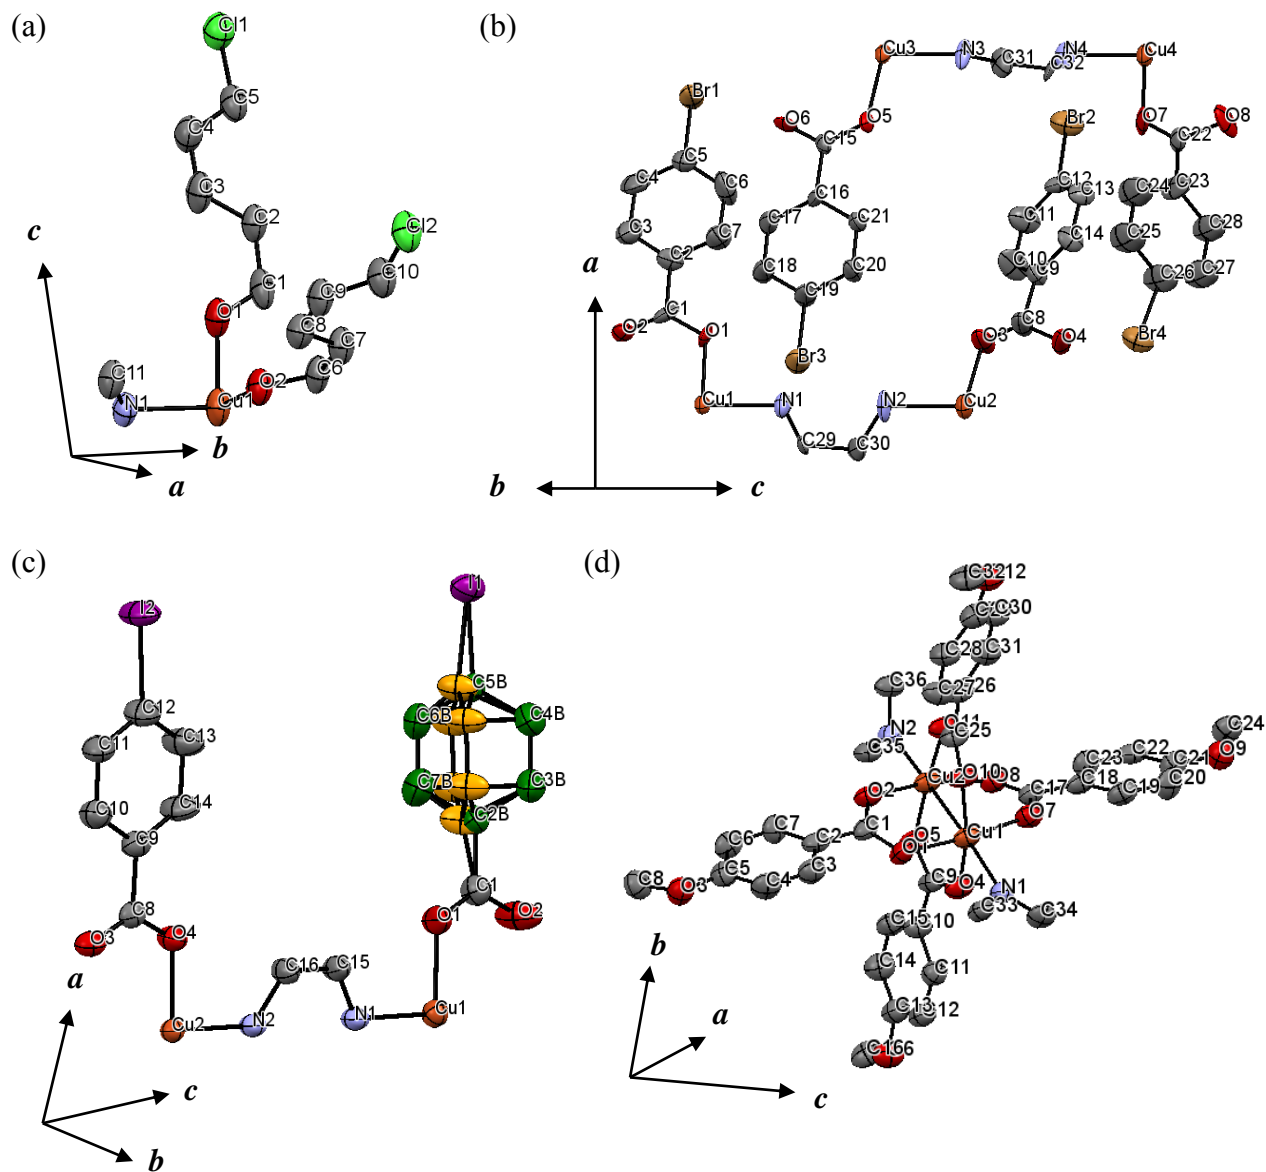

**Figure S9.** Independent structures and atom numbers of (a) **1**, (b) **2**, (c) **3** and (d) **4**. The disordered sites of crystal **3** were highlighted with orange (Ring 3B) and green (Ring 3C) colors.

The crystallographic independent structures of **1**, **2**, **3** and **4** were shown in Figures S8. Inversion center of crystal **1** was between two coppers in paddle-wheel unit. .

**Table S1.** The Torsion angles of selected atoms in crystals **1** - **4**.

|           | around O-C-benzoate<br>selected atoms | Torsion<br>angle, deg | around benzoate-methoxy group<br>selected<br>atoms | Torsion angle, deg |
|-----------|---------------------------------------|-----------------------|----------------------------------------------------|--------------------|
| <b>1A</b> | O1-C1-C2-C3                           | 0.64                  |                                                    |                    |
| <b>1B</b> | O2-C5-C7-C8                           | -2.88                 |                                                    |                    |
| <b>2A</b> | O1-C1-C2-C7                           | -0.24                 |                                                    |                    |
| <b>2B</b> | O3-C8-C9-C10                          | -42.67                |                                                    |                    |
| <b>2C</b> | O5-C15-C16-<br>C21                    | -3.93                 |                                                    |                    |
| <b>2D</b> | O7-C22-C23-<br>C24                    | -34.12                |                                                    |                    |
| <b>3A</b> | O1-C1-C2A-C7A                         | 65.45                 |                                                    |                    |
| <b>3B</b> | O1-C1-C2B-C7B                         | -47.93                |                                                    |                    |
| <b>3C</b> | O4-C8-C9-C14                          | 3.45                  |                                                    |                    |
| <b>4A</b> | O1-C1-C2-C3                           | 14.18                 | C6-C5-O3-<br>C8                                    | 9.88               |
| <b>4B</b> | O4-C9-C10-C11                         | 3.00                  | C14-C13-<br>O6-C16                                 | 7.52               |
| <b>4C</b> | O8-17-C18-C19                         | -5.09                 | C14-C13-<br>O6-C16                                 | 7.25               |
| <b>4D</b> | C10-C25-C26-<br>C27                   | -45.2                 | C14-C13-<br>O6-C16                                 | 2.92               |

Table S1. summarizes the torsion angles of selected atoms in crystal 1 – 4. Torsion angles were calculated by Mercury Version 3.3

## Packing Structures

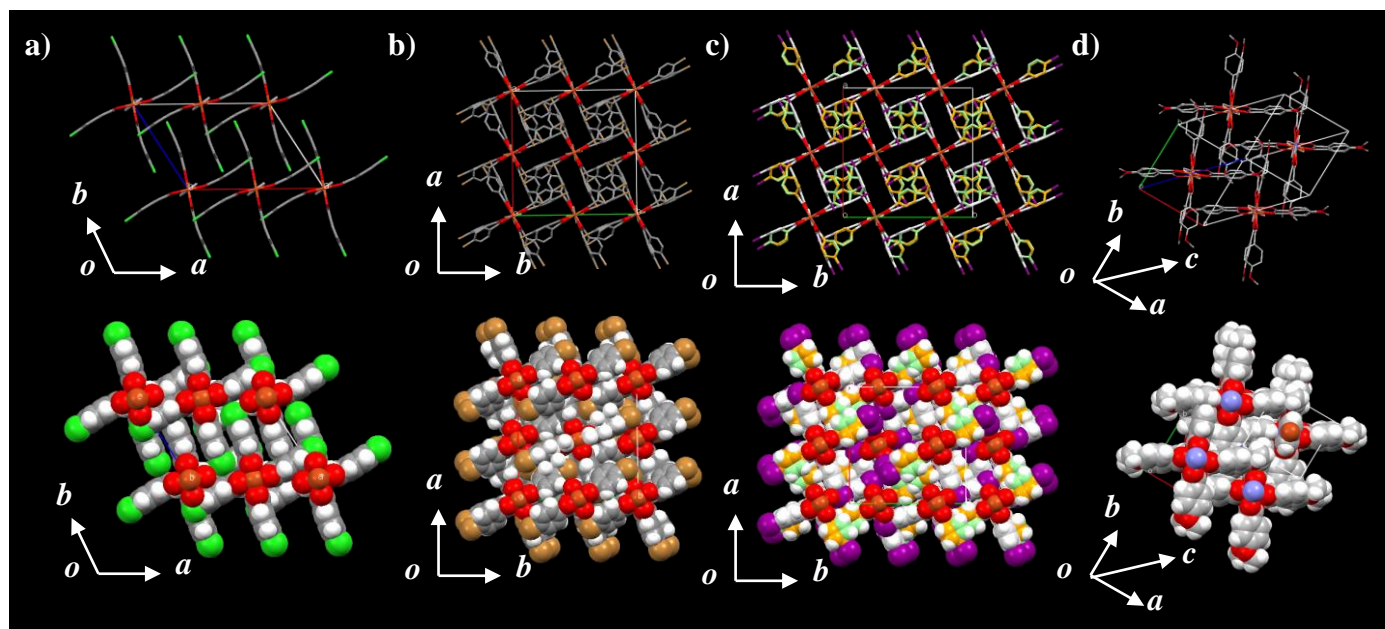

**Figure S10.** Packing structures for a) **1**, b) **2**, c) **3** and d) **4**. Upper figures were modeled by ball and stick, lower figures were modeled by CPK.

From the packing structures, crystallization solvents and effective void space were not found.

## Intermolecular Interactions

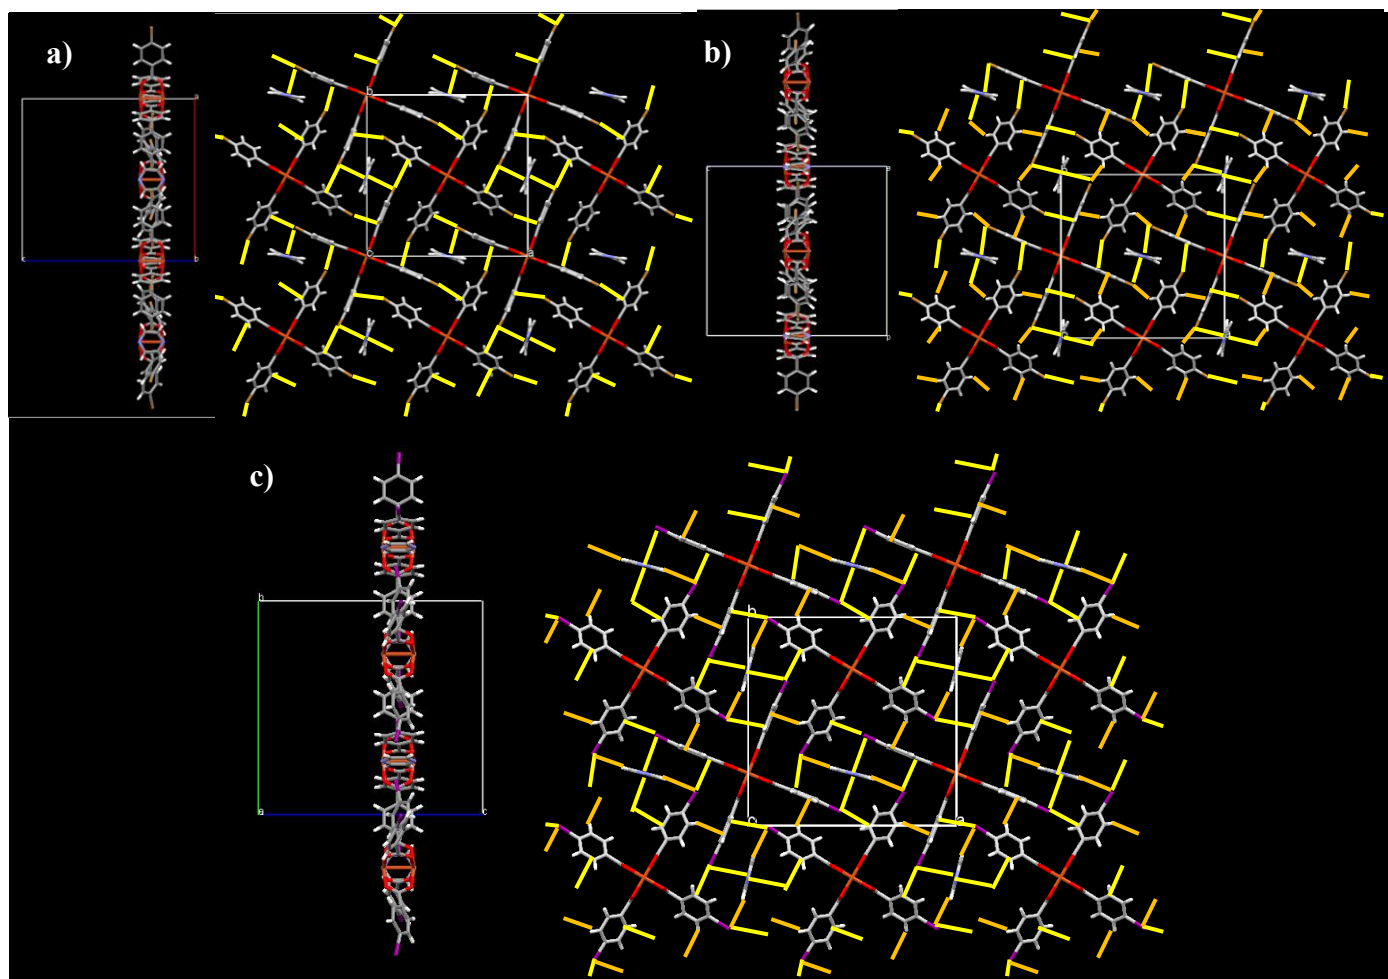

**Figure S11.** Two dimensional layered interactions for a) crystal **2**, where all *p*-BrBA ligands were consistent with **2A** and **2B**, b) crystal **2**, where *p*-BrBA ligands were consistent with **2C** and **2D**, and c) crystal **3**. Left figures in each were viewed along *a* axis, which were corresponded to right figures. In these figures yellow and orange lines were corresponded to halogen...H and halogen... $\pi$  interactions, respectively. All lines were corresponded to the distances less than the sum of vdW radii of two corresponded atoms.

### Offset Face-to-Face $\pi\cdots\pi$ Stacking.

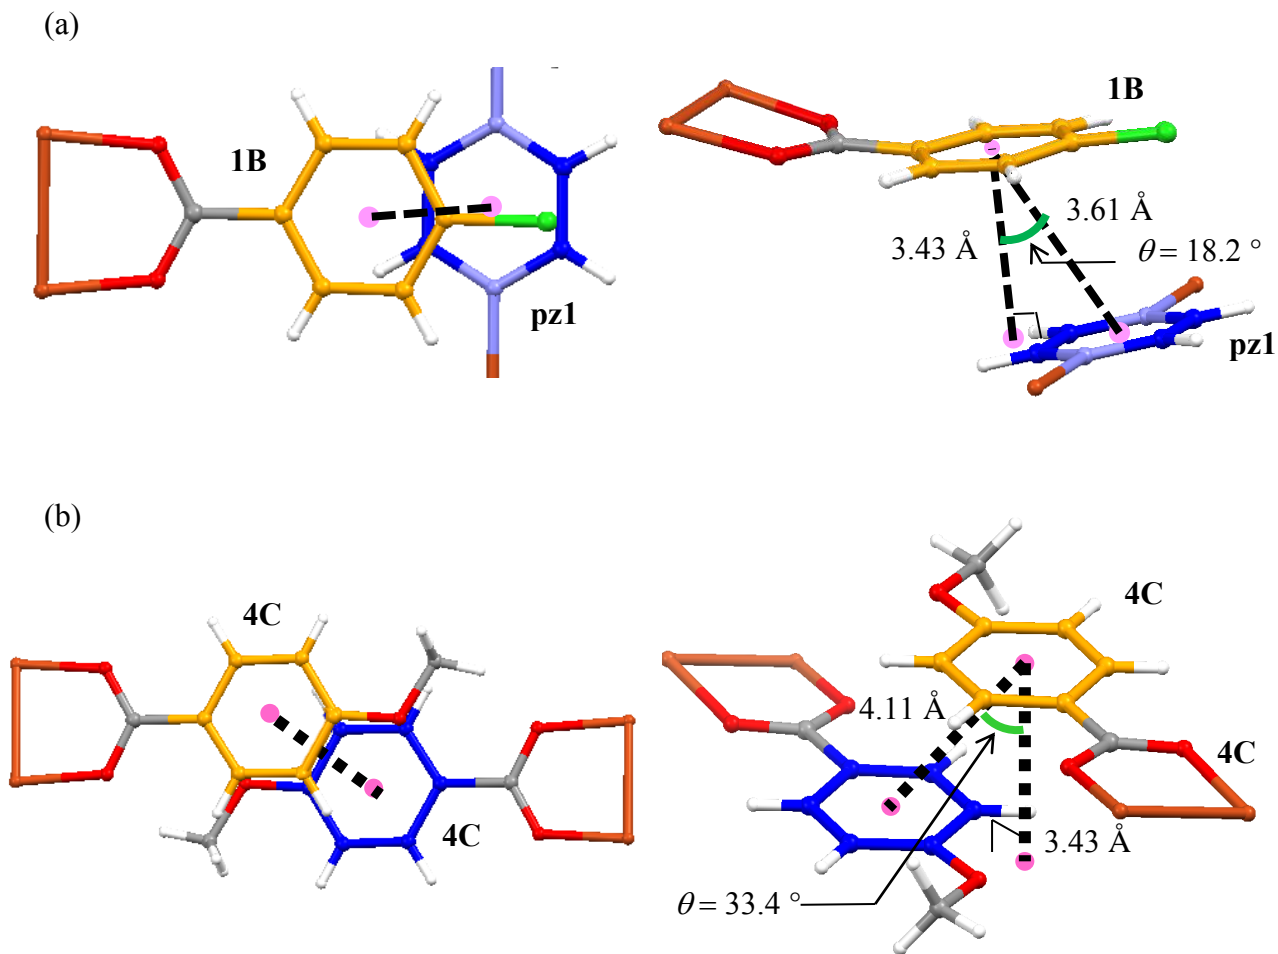

**Figure S12.** Offset  $\pi\cdots\pi$  stacking viewed along top-down (Left) and side direction (Right) between (a) **1B** and **pz1** (crystal **1**), and between **4C** and **4C** (Crystal **4**). The length was picked from the crystal structures and the angles were calculated from the length.

Weak  $\pi\cdots\pi$  stacking were observed in the crystals **1** and **4**. This stacking mode was offset face-to-face  $\pi\cdots\pi$ . Overlap of  $\pi$  planes between **1B** and **pz1** was larger than that between two **4Cs** because of the comparison with the distance between centers of  $\pi$  planes the angles expressed on Figure S12.

### Hirshfeld Surface Analyses.

Because the crystal structures of **2** have four independent *p*-BrBA ligand and crystal **3** have disordered sites (named **3B** and **3B'**), each was separated and the site occupancies of their atoms were changed to 1.0 for all Hirshfeld surface analysis.

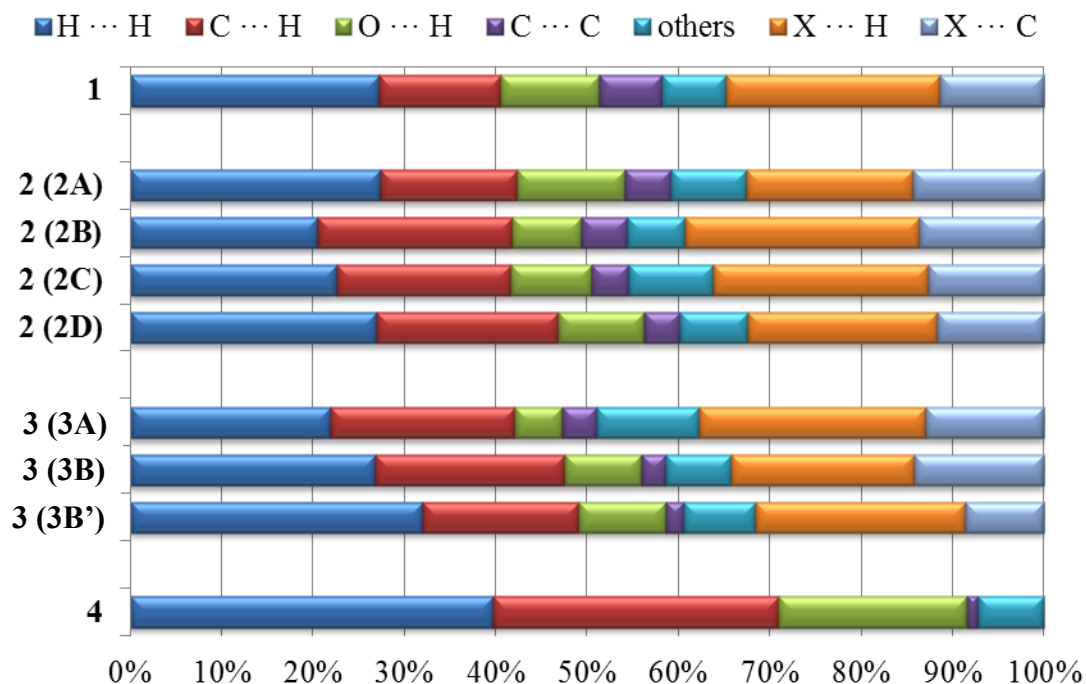

**Figure S13.** Histograms of the type of nearest neighboring atomic contacts from the 2D fingerprint plots. The average percentages for crystals **2** and **3** in Figure 7 were calculated by these values.

**Fingerprint Plot with no fingerprint filtering.**

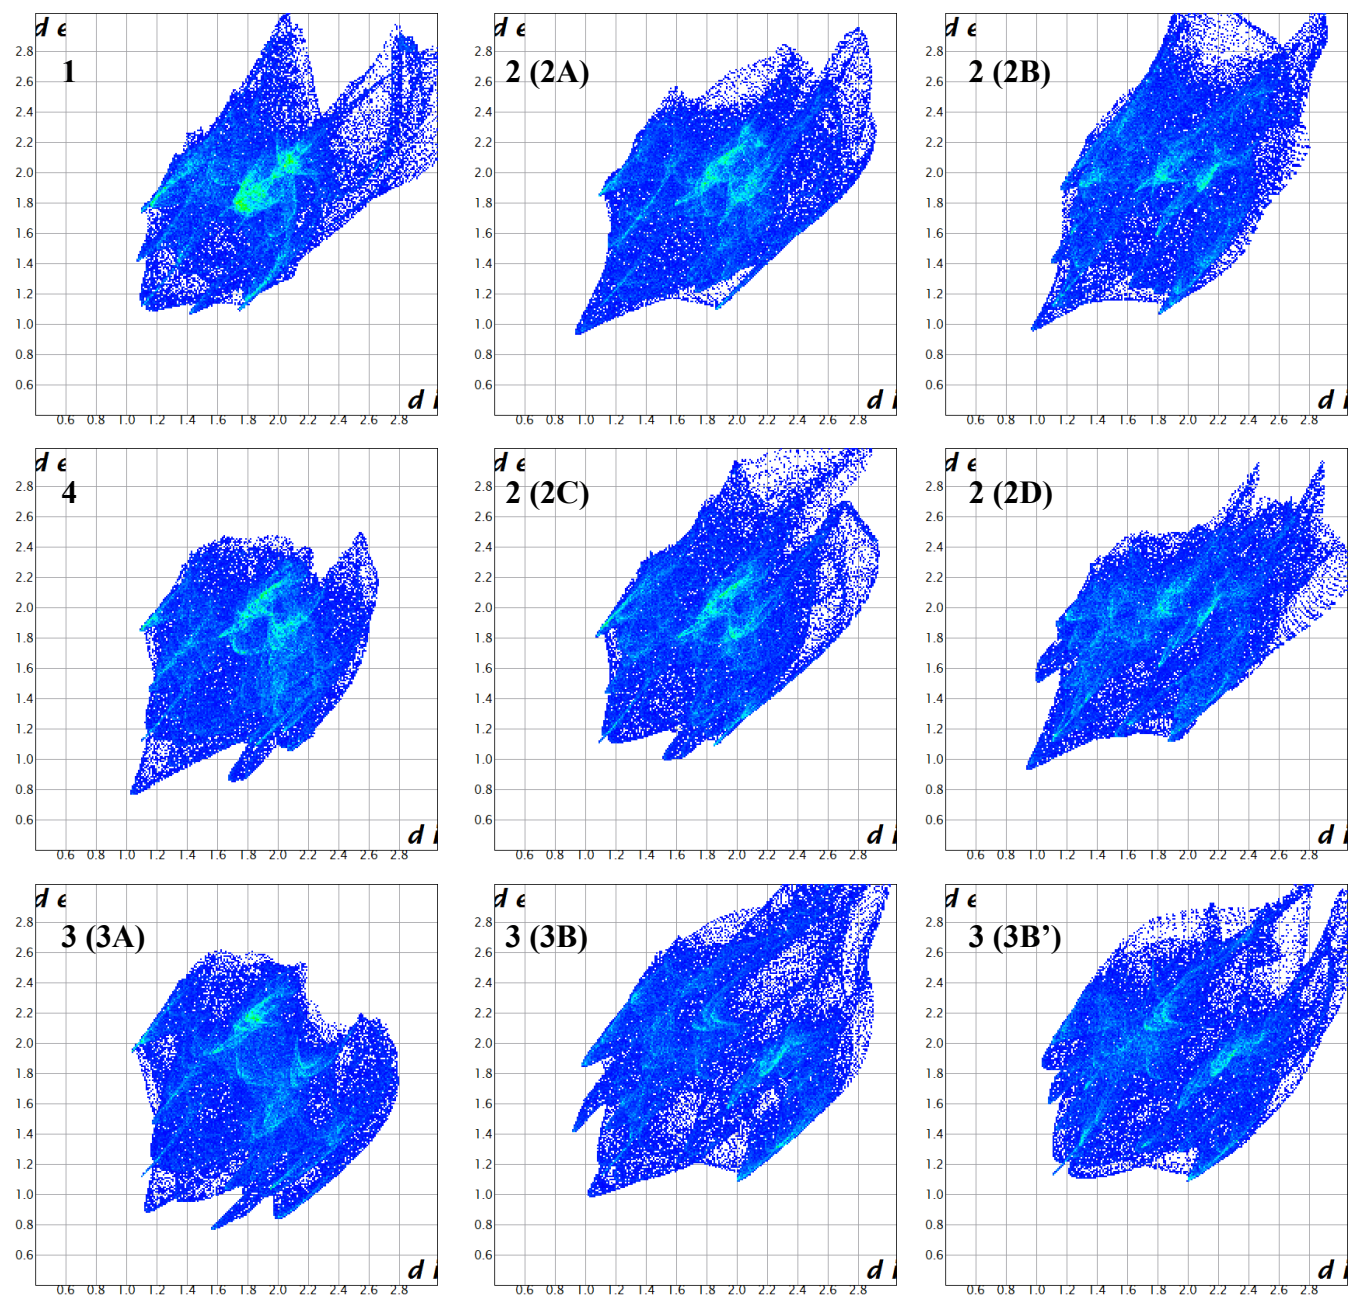

**Figure S14.** Fingerprint plots of 1 ~ 4.



Fingerprint Plot with fingerprint filtering highlighting close contacts from H...H.

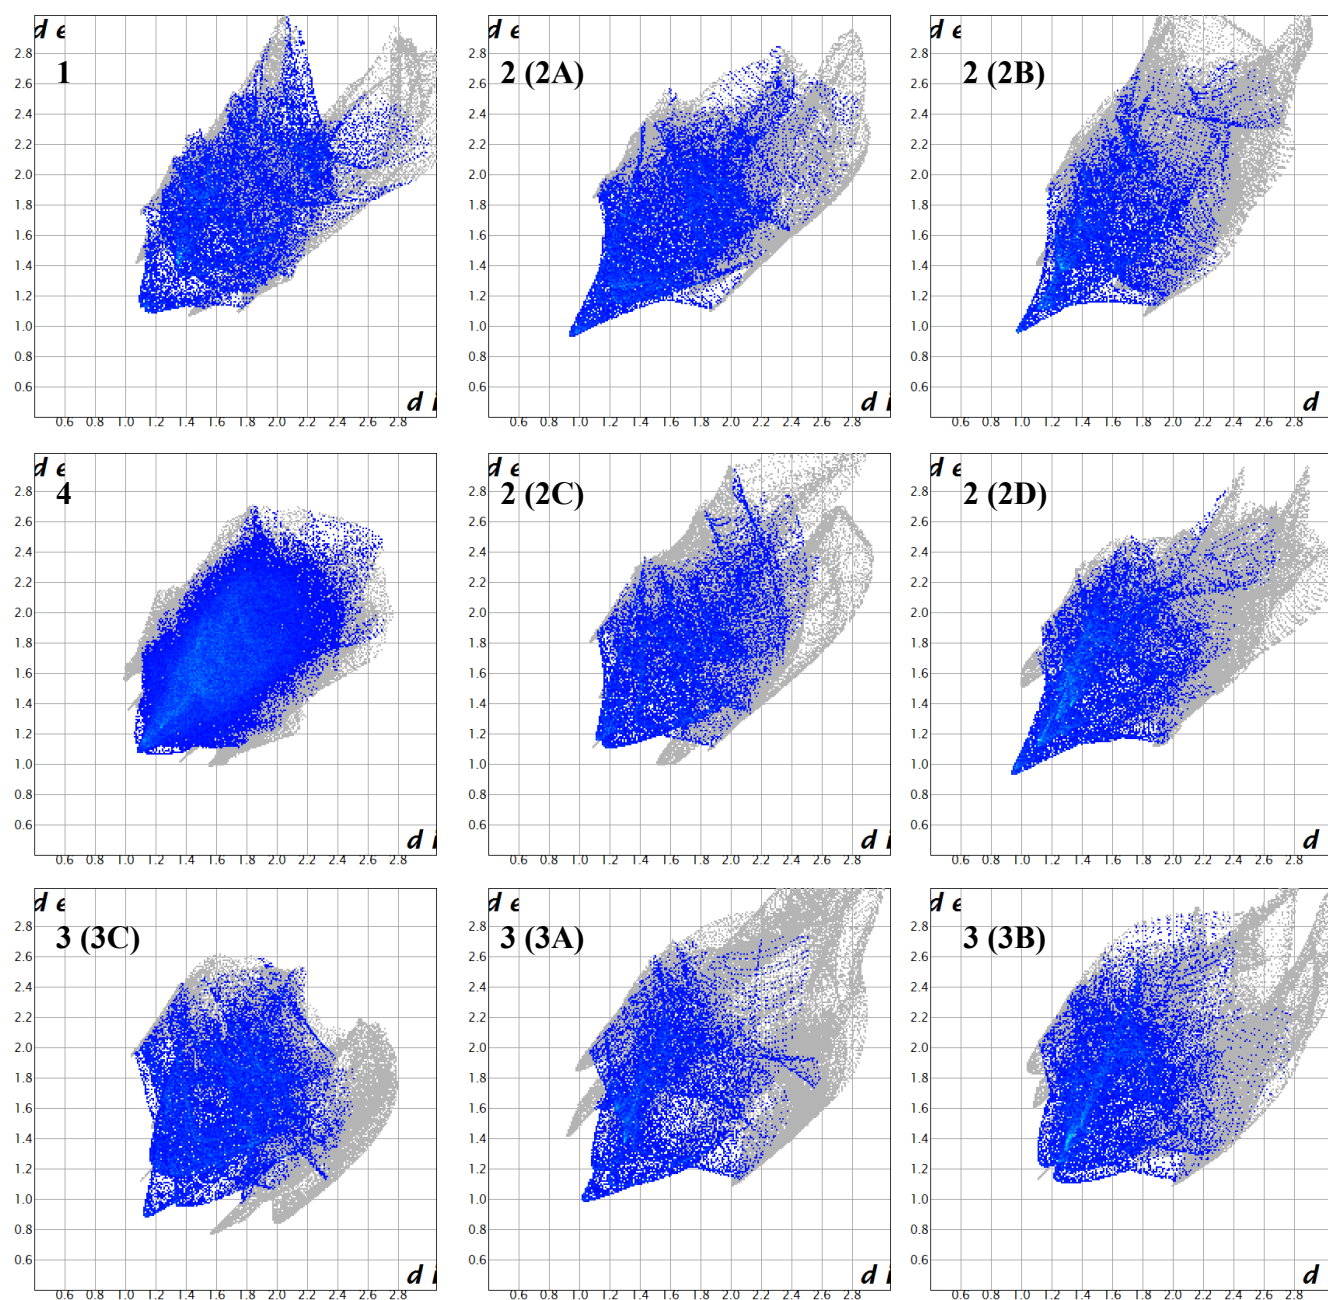

**Figure S15.** 2D fingerprint plots of H...H contacts (blue-colored area) along with the other kinds (gray-colored area). The symbols on the upper left side of each plot corresponded to the numbers of crystals and ligands.



Fingerprint Plot with fingerprint filtering highlighting close contacts from C...H.

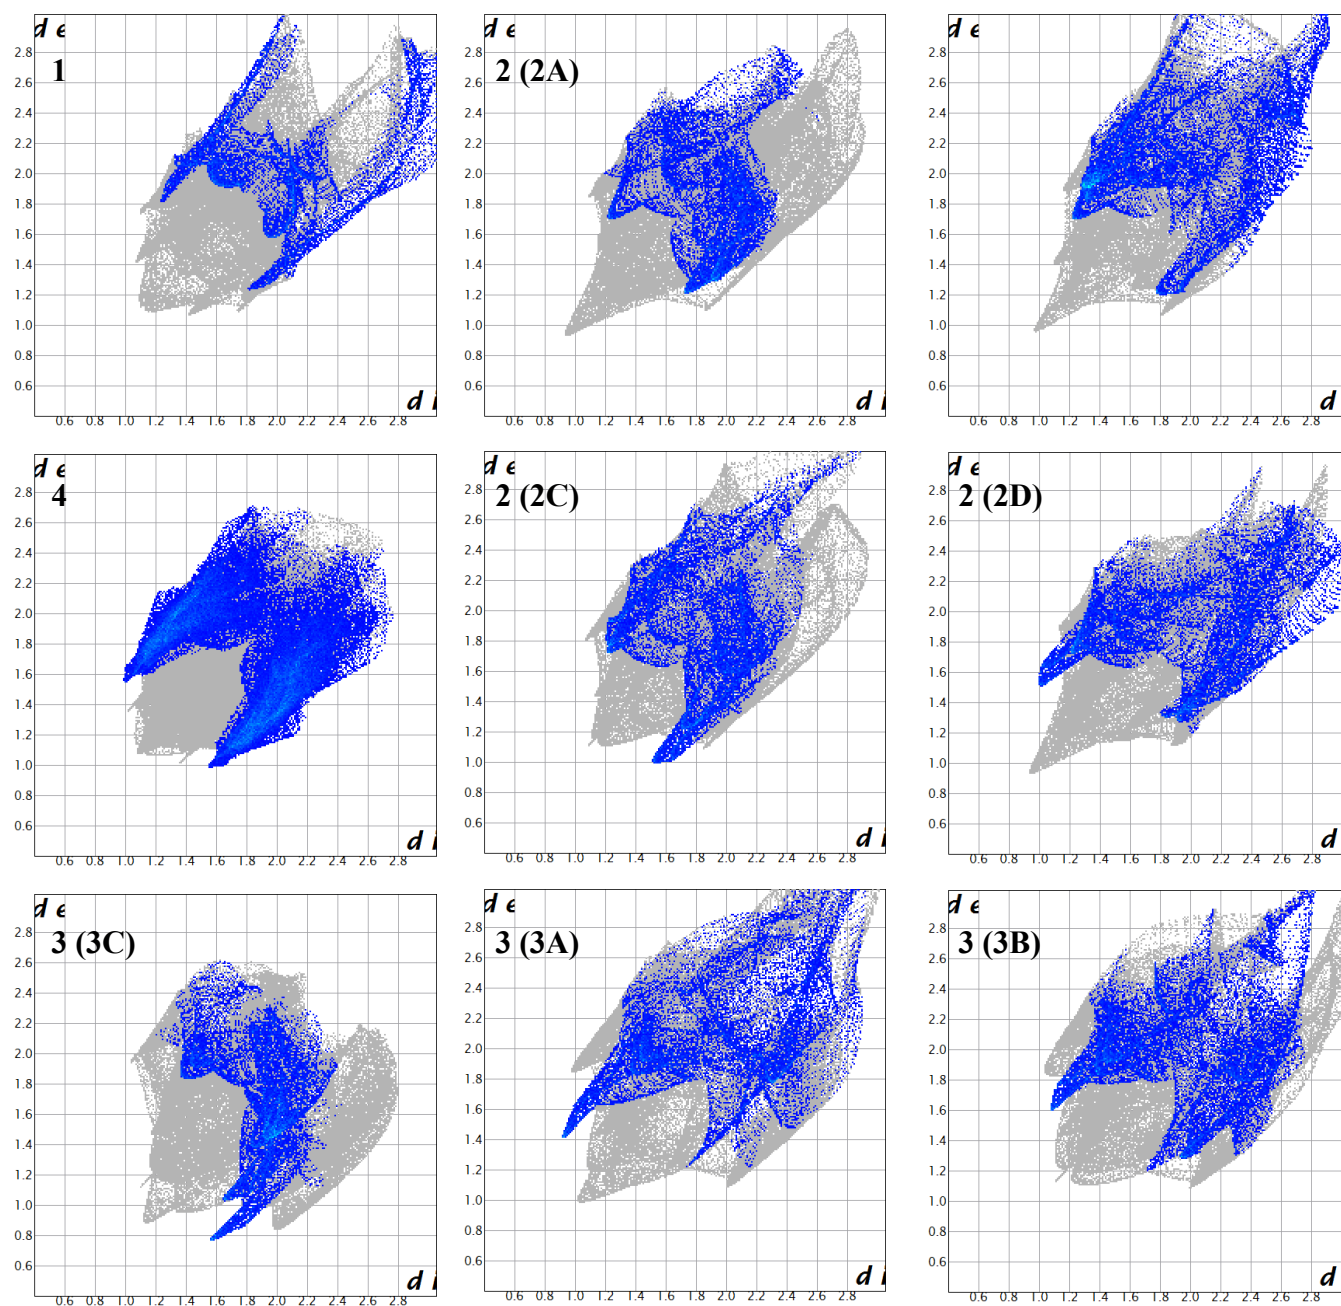

**Figure S16.** 2D fingerprint plots of C...H contacts (blue-colored area) along with the other kinds (gray-colored area). The symbols on the upper left side of each plot corresponded to the numbers of crystals and ligands.

Fingerprint Plot with fingerprint filtering highlighting close contacts from O...H.

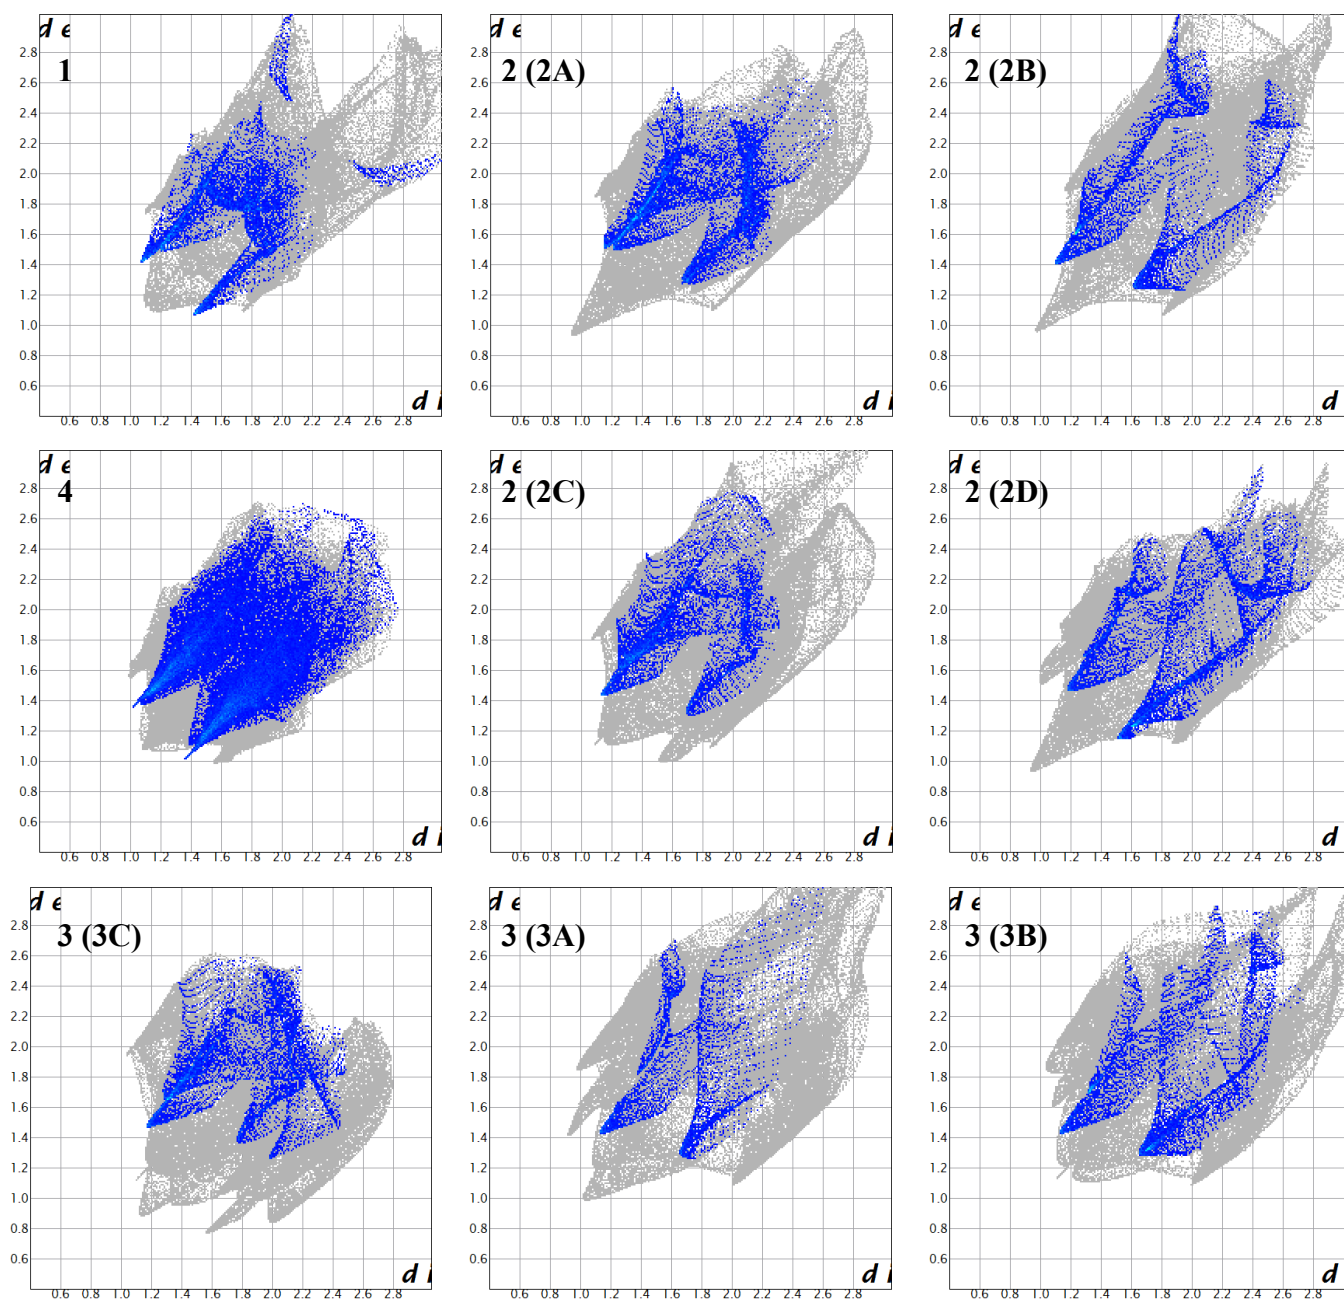

**Figure S17.** 2D fingerprint plots of O...H contacts (blue-colored area) along with the other kinds (gray-colored area). The symbols on the upper left side of each plot corresponded to the numbers of crystals and ligands.

Fingerprint Plot with fingerprint filtering highlighting close contacts from halogen...H.

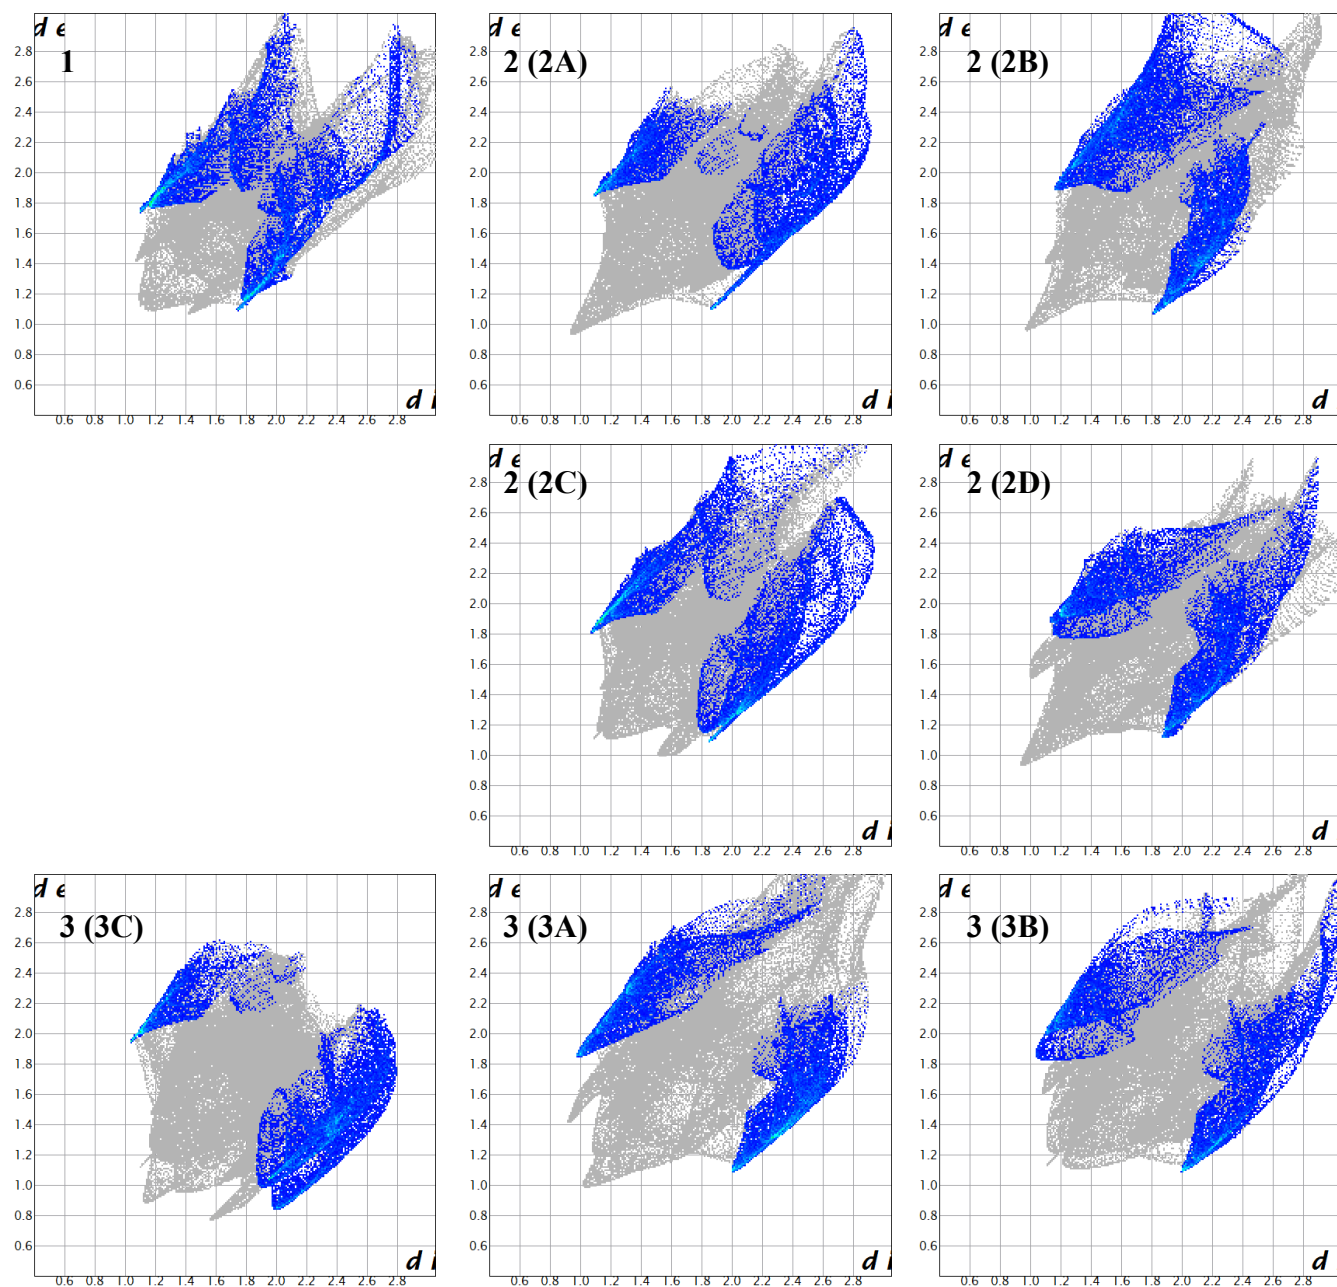

**Figure S18.** 2D fingerprint plots of halogen...H contacts (blue-colored area) along with the other kinds (gray-colored area). The symbols on the upper left side of each plot corresponded to the numbers of crystals and ligands.

Fingerprint Plot with fingerprint filtering highlighting close contacts from halogen...C.

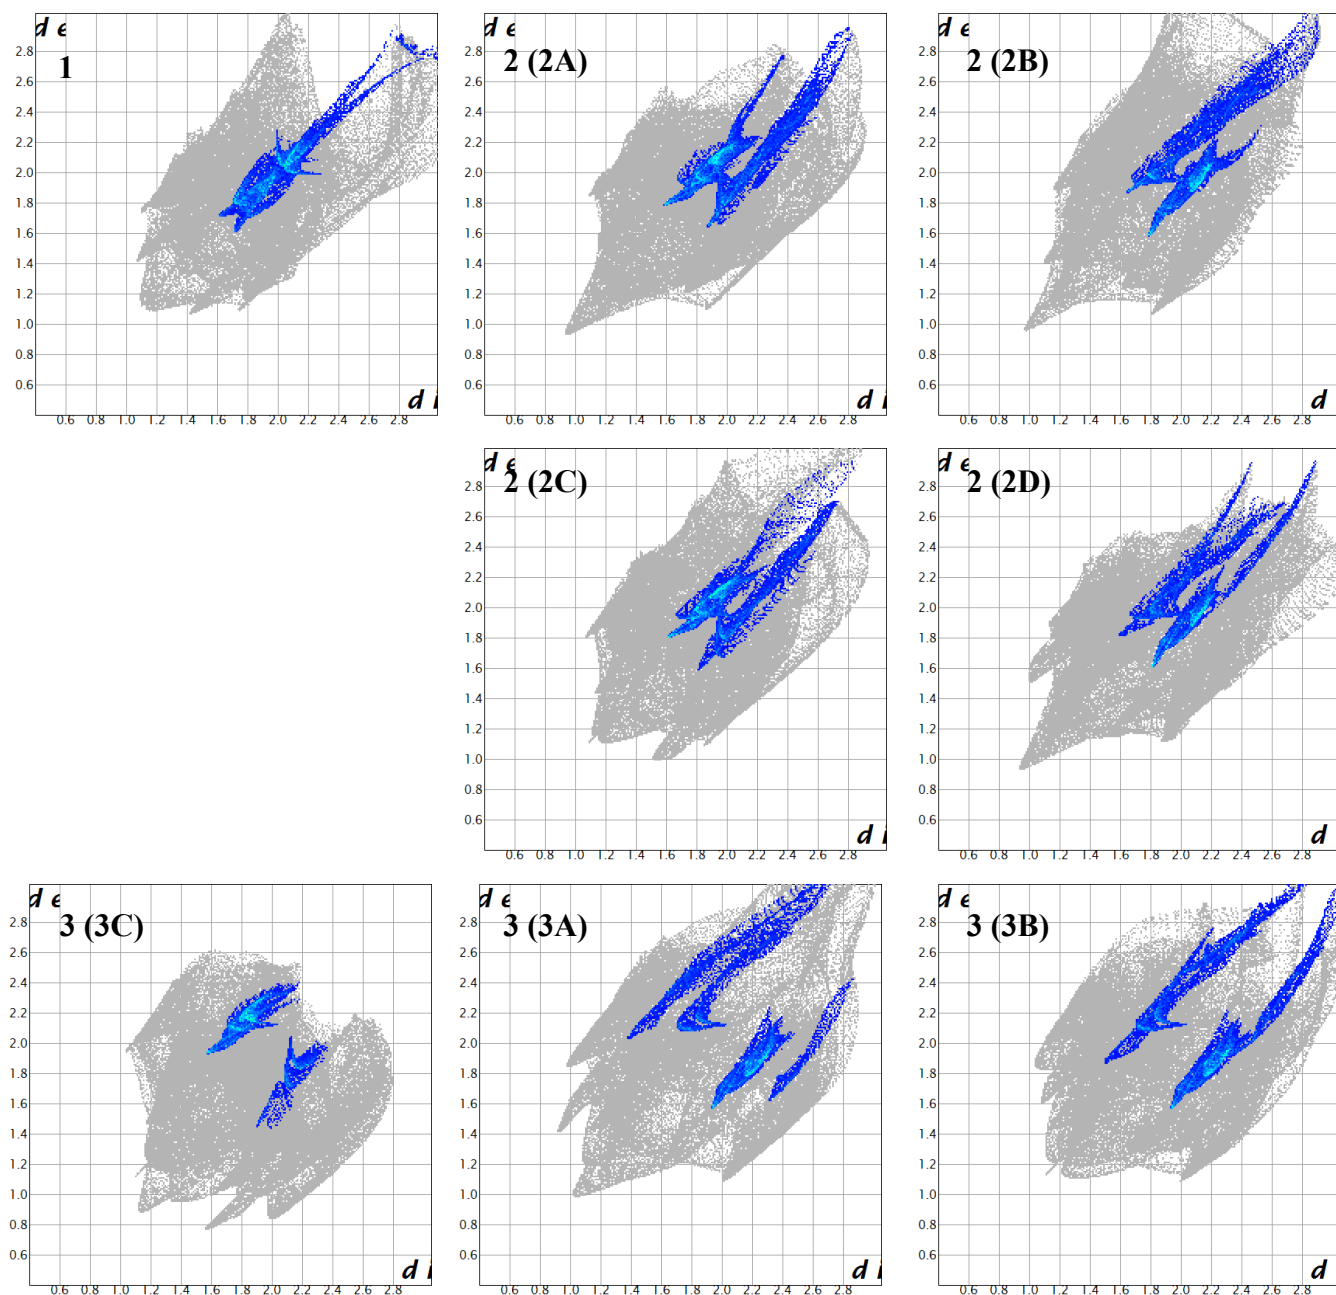

**Figure S19.** 2D fingerprint plots of halogen...C contacts (blue-colored area) along with the other kinds (gray-colored area). The symbols on the upper left side of each plot corresponded to the numbers of crystals and ligands.



## Curvedness Fit

To evaluate planarity of *p*-XBA ligands related to  $\pi\cdots\pi$  interaction for crystal **1** and **4**, curvedness fit were calculated in Hirshfeld Surface analysis.

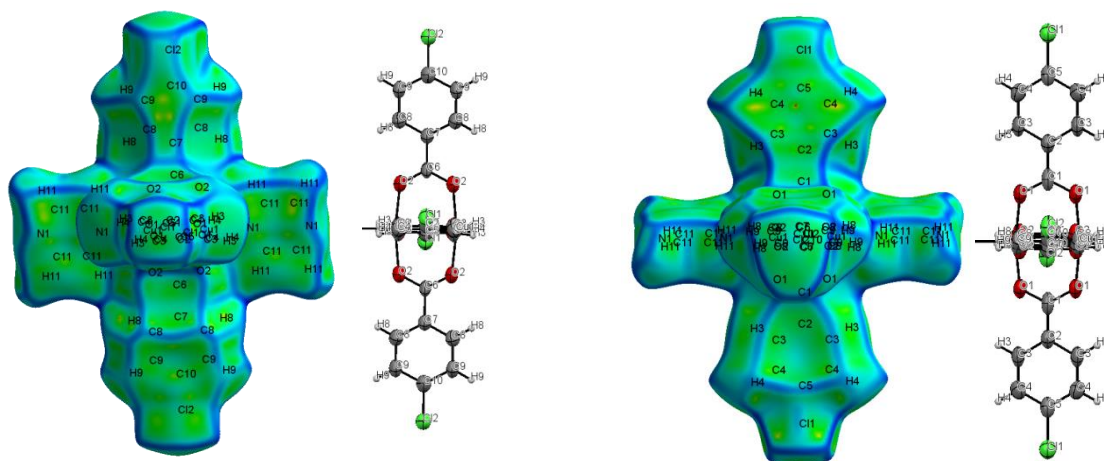

**Figure S20.** Curvedness fit on **4A** and corresponded atom geometries.

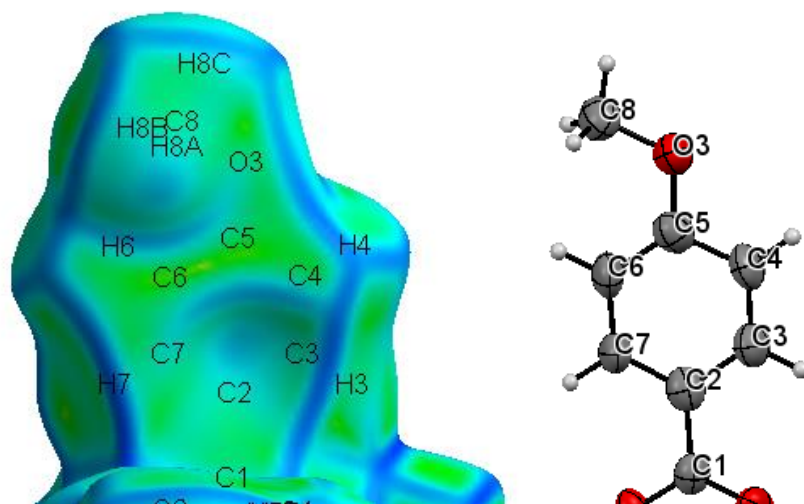

**Figure S21.** Curvedness fit on **4A** and corresponded atom geometries.

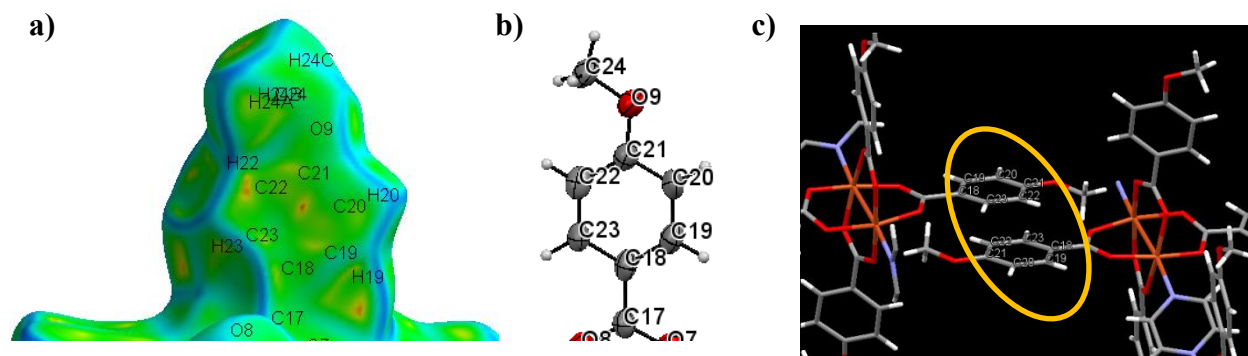

**Figure S22.** a) Curvedness fit on **4C**, b) corresponded atom geometries of **4C** and c)  $\pi\cdots\pi$  interaction between two **4C**.

From the Hirshfeld surface analysis on crystal **1**, Curvedness fit revealed that one plane of **1A** and **pz1** were almost flat. It is corresponded to the existence of  $\pi\cdots\pi$  interaction in crystal **1**. By using Curvedness fit for crystal **4**,  $\pi\cdots\pi$  interactive planes were also clearly observed.
